# Supplementary material
Source: PubMed Central journal article supplement (PMC2657821)
Supplement: neo1104_0377SD1.pdf [file neo1104_0377SD1.pdf]

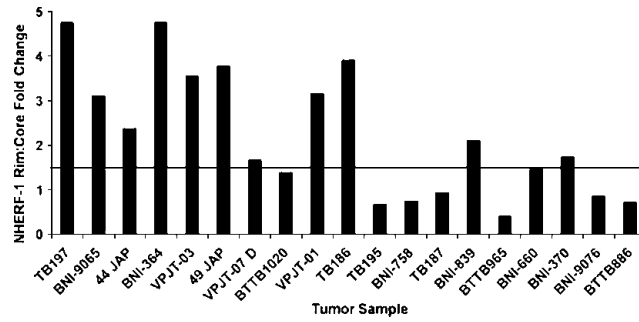

**Figure W1.** A total of 1000 to 2000 stationary (core) and invasive (rim) cells collected on frozen slides from 19 independent GBM patients were harvested by LCM for microarray analysis and quantitative RT-PCR. Amplified cDNA, 2.5  $\mu$ l, from samples collected in Figure 1A were used to validate *NHERF-1* gene expression profiling.
